# Supplementary material
Source: PubMed Central journal article supplement (PMC6204638)

**Table A1.** Overview of cross sectional (CS), case-control (CC) and prospective cohort (PC) studies included in review. Bold font indicates that the study found a significant difference between golfers with and without low back pain (LBP) for that variable.

| Study                            | Design | Quality Score, % | Population Characteristics                                                                                        | LBP Criteria                                                                                                             | N (M:F)      | Potential Risk Factors (Group Comparisons Available)   |                           |                                                                                                                       |                                                  |                                                                                                        |
|----------------------------------|--------|------------------|-------------------------------------------------------------------------------------------------------------------|--------------------------------------------------------------------------------------------------------------------------|--------------|--------------------------------------------------------|---------------------------|-----------------------------------------------------------------------------------------------------------------------|--------------------------------------------------|--------------------------------------------------------------------------------------------------------|
|                                  |        |                  |                                                                                                                   |                                                                                                                          |              | Demographics                                           | Anthropometrics           | Swing Characteristics                                                                                                 | Strength/Flexibility                             | Practice Characteristics                                                                               |
| Batt <sup>3</sup>                | CS     | 12.5             | Members of a British golf club                                                                                    | Site of injury (back); differentiated between injuries received playing golf and injuries affecting golf                 | 193 (164:29) | Age; sex                                               |                           |                                                                                                                       |                                                  | Handicap; years of experience; rounds per month                                                        |
| Burdorf et al <sup>6</sup>       | PC     | 100.0            | Male novice recreational golfers at Dutch ranges and clubs                                                        | Lifetime history of low back pain ( <b>frequency, duration and severity of episodes</b> ); 1-year incidence of back pain | 196 (196:0)  | Age; education; occupation; physical activity at work; | Height; weight            |                                                                                                                       |                                                  | Involvement in other sports; playing frequency; handicap at 1 year; number of lessons; regular warm-up |
| Cole and Grimshaw <sup>12</sup>  | CC     | 25.0             | Not reported                                                                                                      | ≥20mm pain severity on VAS                                                                                               | 27 (27:0)    | Age                                                    | <b>Height</b> ; mass; BMI | Onset and cessation of external oblique and <b>erector spinae</b> activity                                            |                                                  | Handicap                                                                                               |
| Cole and Grimshaw <sup>9</sup>   | CC     | 33.3             | Not reported                                                                                                      | ≥20mm pain severity on VAS                                                                                               | 30 (30:0)    | Age                                                    | Height; <b>mass</b>       | Amplitude of <b>external oblique</b> and <b>erector spinae</b> activity                                               |                                                  | Sub-grouped into high-handicap and low-handicap cohorts                                                |
| Cole and Grimshaw <sup>11</sup>  | CC     | 25.0             | Golfers at local private and public courses in Australia; over 18 years; playing for >12 months; current handicap | History of LBP when playing or practicing golf                                                                           | 27 (27:0)    | Age                                                    | <b>Height</b> ; mass; BMI | Trunk lateral flexion; trunk and hip axial rotation and separation angle; trunk axial angular velocity; crunch factor |                                                  | Handicap                                                                                               |
| Evans and Oldreive <sup>15</sup> | CC     | 16.7             | Recreational golfers from single UK club; playing twice weekly; age 20-45 years; playing > 2 years                | History of LBP that prevents playing golf in last 2 years; no pain in previous 3 months                                  | 20 (20:0)    |                                                        |                           |                                                                                                                       | <b>Endurance of transversus abdominis muscle</b> |                                                                                                        |

|                                    |    |      |                                                                     |                                                                                                                                                                                                        |               |          |                |                                                                                                                                                                                          |                                                                                                                                        |
|------------------------------------|----|------|---------------------------------------------------------------------|--------------------------------------------------------------------------------------------------------------------------------------------------------------------------------------------------------|---------------|----------|----------------|------------------------------------------------------------------------------------------------------------------------------------------------------------------------------------------|----------------------------------------------------------------------------------------------------------------------------------------|
| Evans et al <sup>16</sup>          | PC | 33.3 | Trainee professionals in the Queensland PGA                         | Moderate or severe symptoms; symptom impact on golf; presence/absence of leg pain                                                                                                                      | 14 (14:0)     |          | <b>BMI</b>     | Endurance of abdominals and erector spinae; <b>endurance asymmetry</b> ; peak hip and trunk extensor strength; hamstring and <b>hip flexor</b> flexibility; lumbar spine range of motion |                                                                                                                                        |
| Gosheger et al <sup>21</sup>       | CS | 12.5 | Golfers at 24 German courses; professional and recreational golfers | Site of symptoms (lumbar, thoracic, cervical spine, categories collapsed into spine for most analyses); trauma versus overuse; duration of absence from golf; symptoms related to or unrelated to golf | 703 (456:187) | Age; sex | <b>BMI</b>     |                                                                                                                                                                                          | Stretching and warm-up behaviors; rounds per week; driving range shots per week; <b>golf bag carrying</b> ; <b>professional status</b> |
| Gulgin and Armstrong <sup>22</sup> | CS | 12.5 | Professional golfers on LPGA Tour                                   | Site of symptoms (right, left, bilateral, upper back, mid back, low back)                                                                                                                              | 31 (0: 31)    | Age      | Height; weight | Passive hip internal and external rotation range of motion; side-to-side asymmetry                                                                                                       | Stretching routine; strengthening program                                                                                              |

|                                  |    |      |                                                                                                    |                                                                                                                                                                  |                   |     |                     |                                                                                                                                                                                                          |                                                                                                                                 |
|----------------------------------|----|------|----------------------------------------------------------------------------------------------------|------------------------------------------------------------------------------------------------------------------------------------------------------------------|-------------------|-----|---------------------|----------------------------------------------------------------------------------------------------------------------------------------------------------------------------------------------------------|---------------------------------------------------------------------------------------------------------------------------------|
| Horton et al <sup>27</sup>       | CC | 25.0 | Professional and elite recreational golfers; members of Alberta PGA or Alberta GA; under 55 years  | Report of always or often experiencing LBP after golf; symptoms for > 6 months                                                                                   | 18 (18: 0)        | Age | Height; weight; BMI | Amplitude of rectus abdominis, external oblique and internal oblique activity before and after practice session; <b>onset of external oblique</b> and internal oblique before and after practice session | Abdominal muscle fatigue before and after practice session                                                                      |
| Kalra et al <sup>30</sup>        | CC | 25.0 | Handicap ≤ 20; right-handed; 25-65 years                                                           | History of LBP for > 2 weeks; affecting golf within past year; ODI score ≥ 24%; symptoms central or on right side; symptoms resulted from or aggravated by golf; | 30 (not reported) |     |                     | <b>Trunk strength; trunk range of motion; hamstring flexibility</b>                                                                                                                                      |                                                                                                                                 |
| Lindsay and Horton <sup>34</sup> | CC | 25.0 | Members of Alberta PGA                                                                             | Report of always experiencing LBP after golf                                                                                                                     | 54 (54:0)         | Age | Height; mass        | Trunk flexion, extension, <b>lateral flexion</b> , axial rotation; peak trunk angular <b>flexion</b> , extension, <b>lateral flexion</b> and axial velocity                                              | Rounds per month; practice sessions per month; balls per practice session; putting sessions per month; time per putting session |
| Lindsay and Horton <sup>35</sup> | CC | 25.0 | Members of Alberta PGA; elite amateurs; patients of local physical therapy clinics; under 50 years | Report of always or often experiencing LBP after golf; symptoms for > 6 months                                                                                   | 39 (39:0)         | Age | Height; mass        | Trunk axial rotation strength; trunk axial <b>rotation endurance</b>                                                                                                                                     |                                                                                                                                 |

|                              |    |      |                                                               |                                                                                                         |                   |                                                                 |                                    |                                                                                                                                                                                |                                                                                                                                                                                 |                                      |
|------------------------------|----|------|---------------------------------------------------------------|---------------------------------------------------------------------------------------------------------|-------------------|-----------------------------------------------------------------|------------------------------------|--------------------------------------------------------------------------------------------------------------------------------------------------------------------------------|---------------------------------------------------------------------------------------------------------------------------------------------------------------------------------|--------------------------------------|
| Murray et al <sup>43</sup>   | CC | 41.7 | Members of two British golf clubs                             | Current LBP or history of LBP within previous year; symptoms for > 2 weeks; over-use rather than trauma | 64 (43:21)        | Age; sex                                                        | Height; <b>weight</b> ; handedness | Hip active and passive <b>internal</b> and external rotation; side-to-side hip asymmetry                                                                                       | Handicap; rounds per week; years of experience                                                                                                                                  |                                      |
| McHardy et al <sup>40</sup>  | CS | 12.5 | Members of golf clubs randomly selected from across Australia | Current golf-related LBP or history of golf-related LBP in past 12 months                               | 1725 (1316:318)   | Age; sex                                                        |                                    |                                                                                                                                                                                | Handicap; duration of chipping/putting practice per week; <b>full shot practice per week</b> ; games per week                                                                   |                                      |
| Nicholas et al <sup>44</sup> | CS | 75.0 | Members of NY State GA; over 21 years; playing ≥ 1 year       | Back condition from golf                                                                                | 368 (294:74)      | <b>Age; sex</b> ; history of smoking; history of alcohol intake | <b>Self-report of over-weight</b>  |                                                                                                                                                                                | Handicap; holes per week; weeks of play per year; years of play                                                                                                                 |                                      |
| Silva et al <sup>48</sup>    | CC | 25.0 | Right-handed golfers                                          | Report of experiencing back pain after playing 18 holes > 65% of the time                               | 21 (not reported) | Age                                                             | Height, mass                       | Discriminant capacity of non-linear muscle activation patterns of <b>rectus femoris, biceps femoris, semi-tendinosis, external oblique, erector spinae and gluteus maximus</b> | Handicap; years of play                                                                                                                                                         |                                      |
| Tsai et al <sup>52</sup>     | CC | 25.0 | Male, right-handed golfers with handicap < 20                 | Report of mechanical LBP aggravated by golf within previous 2 years; asymptomatic                       | 32 (32:0)         | Age                                                             | Height; mass                       | Axial trunk/pelvis separation; <b>peak axial trunk rotation</b> ; peak L5-S1 moments                                                                                           | <b>Peak trunk and hip strength</b> ; trunk and hip active range of motion; hamstring flexibility; FABER test; active spinal repositioning error; center of pressure velocity in | Handicap; estimated driving distance |

|                         |    |      |                                  |                                                                        |           |     |                                                                                                                                                                                              |
|-------------------------|----|------|----------------------------------|------------------------------------------------------------------------|-----------|-----|----------------------------------------------------------------------------------------------------------------------------------------------------------------------------------------------|
| Vad et al <sup>53</sup> | CC | 33.3 | Professional golfers on PGA Tour | Report of LBP limiting golf performance for > 2 weeks in previous year | 42 (42:0) | Age | single-limb stance<br><br><b>Hip internal rotation range of motion;</b><br>FABER test;<br><b>side-to-side hip asymmetry;</b><br>trunk flexion and <b>lumbar extension</b><br>range of motion |
|-------------------------|----|------|----------------------------------|------------------------------------------------------------------------|-----------|-----|----------------------------------------------------------------------------------------------------------------------------------------------------------------------------------------------|

CC, case-control; CS, cross-sectional; F, female; LBP, low back pain; M, male; PC, prospective cohort.

**Figure A1.** Pooled standardized mean difference in age between golfers with and without low back pain. (a) All available data. (b) Subanalyses of studies explicitly reporting samples of recreational (top) and professional (bottom) golfers.

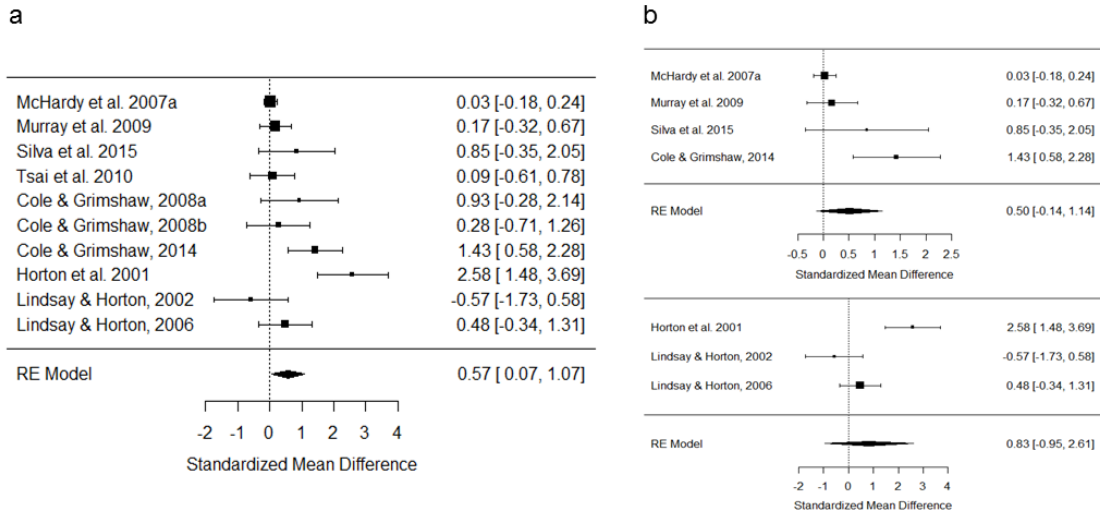

**Figure A2.** Pooled standardized mean difference in body mass between golfers with and without low back pain. (a) All available data. (b) Subanalyses of studies explicitly reporting samples of recreational (top) and professional (bottom) golfers.

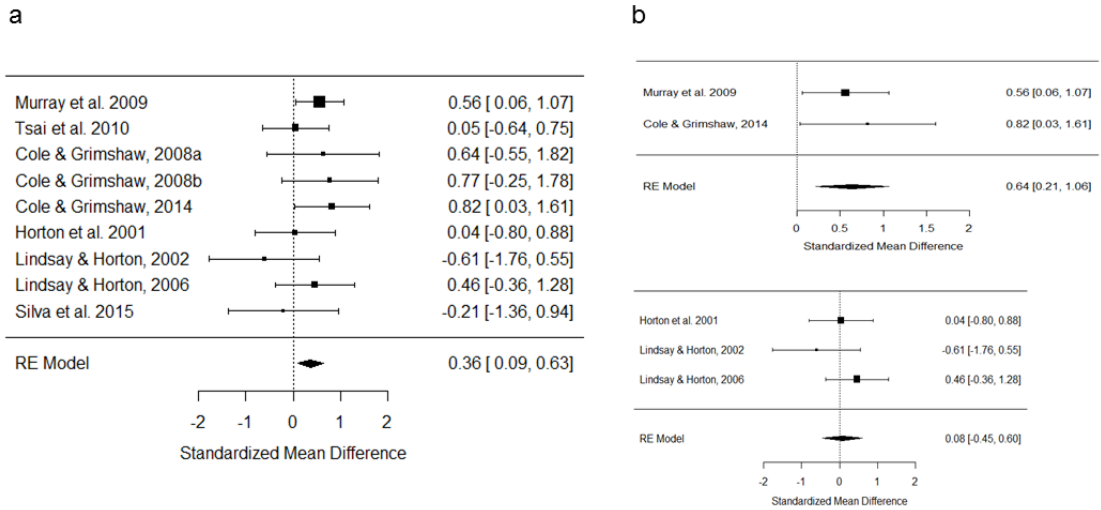

Supplement: 28951_Appendix.pdf [file 28951_Appendix.pdf]
